# Supplementary material
Source: PubMed Central journal article supplement (PMC2745116)
Supplement: NIHMS87622-supplement-1.pdf [file NIHMS87622-supplement-1.pdf]

| Condition     | $I_{amp.}$ (pA) | Spike charge (pC) | Samples (cells/preparations) |
|---------------|-----------------|-------------------|------------------------------|
| <b>0.5 Hz</b> | 5.198±0.823     | 0.117±0.009       | 12/7                         |
| <b>15 Hz</b>  | 19.117±1.433    | 0.356±0.019       | 10/7                         |
| <b>0.5Hz</b>  |                 |                   |                              |
| CytoD         | 10.285±0.853    | 0.267±0.014       | 10/7                         |
| Jas           | 6.422±0.878     | 0.137±0.009       | 10/3                         |
| ML7           | 5.972±0.560     | 0.150±0.020       | 9/2                          |
| M18           | 6.594±0.919     | 0.122±0.013       | 8/3                          |
| Bleb          | 5.564±0.744     | 0.135±0.010       | 10/2                         |
| M18 + Jas     | 5.892±0.497     | 0.127±0.010       | 9/3                          |
| <b>15Hz</b>   |                 |                   |                              |
| Jas           | 11.302±1.006    | 0.195±0.013       | 15/7                         |
| ML-7          | 8.101±0.587     | 0.223±0.009       | 11/5                         |
| M18           | 8.905±0.868     | 0.189±0.011       | 6/5                          |
| Bleb          | 7.292±0.586     | 0.111±0.007       | 8/6                          |
| M18 + Jas     | 5.479±0.435     | 0.114±0.008       | 8/6                          |
| CytoD         | 18.542±1.067    | 0.315±0.008       | 10/2                         |

Table S1. Mean analysis of amperometric parameters for all experimental conditions.

Single spike amplitude ( $I_{amp.}$ ), spike charge (pC) and the slope (nA/s, measured between 35% and 65% of maximum spike amplitude) for each spike. Each of these parameters have been shown to increase with the transition between kiss and run to full collapse exocytic modes. Values for each of these parameters are represented as mean value  $\pm$  SEM. Values in each experimental condition that are significant from un-treated controls at the same stimulus condition are indicated by a shaded box (■),  $p < 0.05$ ; Student's t-test).
