# Supplementary material
Source: PubMed Central journal article supplement (PMC2745116)
Supplement: NIHMS87622-supplement-2.pdf [file NIHMS87622-supplement-2.pdf]

| Condition           | Capacitance variance ( $\delta^2$ , fF <sup>2</sup> ) | Samples (cells/preparations) |
|---------------------|-------------------------------------------------------|------------------------------|
| <b>Unstimulated</b> | 1.080±0.051                                           | 5/6                          |
| <b>0.5 Hz</b>       | 2.891±0.377                                           | 15/5                         |
| <b>15 Hz</b>        | 1.085±0.114                                           | 15/6                         |
| <hr/>               |                                                       |                              |
| <b>0.5Hz</b>        |                                                       |                              |
| CytoD               | 1.076±0.212                                           | 10/6                         |
| Jas                 | 2.550±0.718                                           | 5/3                          |
| ML7                 | 2.389±0.413                                           | 5/2                          |
| M18                 | 2.538±0.111                                           | 5/3                          |
| Bleb                | 2.120±0.950                                           | 5/2                          |
| M18 + Jas           | 2.573±0.217                                           | 5/2                          |
| <hr/>               |                                                       |                              |
| <b>15Hz</b>         |                                                       |                              |
| Jas                 | 2.318±0.439                                           | 15/6                         |
| ML-7                | 2.176±0.504                                           | 10/5                         |
| M18                 | 2.262±0.234                                           | 10/5                         |
| Bleb                | 2.120±0.491                                           | 10/5                         |
| M18 + Jas           | 2.670±0.461                                           | 10/5                         |
| CytoD               | 1.174±0.293                                           | 5/2                          |
| <hr/>               |                                                       |                              |

Table S2. Mean analysis of capacitance variance for all experimental conditions. Capacitance variance reports the presence of  $\Omega$ -figures in the cell membrane during exocytosis. Low variance in unstimulated cells and in cells stimulated at 15 Hz are consistent with either no exocytosis or full granule collapse, respectively. Elevated variance under 0.5 Hz indicates kiss and run exocytosis. Values for each of these parameters are represented as mean value  $\pm$  SEM. Values in each experimental condition that are significant from un-treated controls at the same stimulus condition are indicated by a shaded box (■,  $p < 0.05$ ; Student's t-test).
